1 Pre-warming before general anesthesia with isoflurane delays

2 the onset of hypothermia in rats

3

4

5 Maxime Rufiange<sup>1,2</sup>, Vivian SY Leung<sup>1,2</sup>, Keith Simpson<sup>3</sup>, Daniel SJ Pang<sup>1,2\*</sup>

6

7

8 <sup>1</sup>Department of Clinical Sciences, Faculty of Veterinary Medicine, Université de  
9 Montréal, Saint-Hyacinthe, QC, Canada

10 <sup>2</sup>Groupe de Recherche de Pharmacologie Animale du Québec (GREPAQ), Faculty of  
11 Veterinary Medicine, Université de Montréal, Saint-Hyacinthe, QC, Canada.

12 <sup>3</sup>Vetronic Services Ltd, Abbotskerwell, England

13

14

15 \*Corresponding author

16 Email: [danielpang17@hotmail.com](mailto:danielpang17@hotmail.com) (DSJP)

17

18

19 Key words: pre-warming, enhanced recovery after surgery, hypothermia, temperature,

20 laboratory rodent

## 21 Abstract

22 General anesthesia causes hypothermia by impairing normal thermoregulatory  
23 mechanisms. Redistribution of warm blood from the core to the periphery is the primary  
24 mechanism in the development of hypothermia and begins following induction of  
25 anesthesia. Raising skin temperature before anesthesia reduces the temperature gradient  
26 between core and periphery, decreasing the transfer of heat. This prospective, crossover  
27 study (n = 17 adult male and female SD rats) compared three treatment groups: PW1%  
28 (pre-warming to increase core temperature 1% over baseline), PW40 (pre-warming to  
29 increase core temperature to 40°C) and NW (no warming). The PW1% group was  
30 completed first to ensure tolerance of pre-warming. Treatment order was then  
31 randomized and alternated after a washout period. Once target temperature was achieved,  
32 anesthesia was induced and maintained with isoflurane in oxygen without further external  
33 temperature support. Pre-warming was effective at delaying the onset of hypothermia,  
34 with a significant difference between PW1% (11.2 minutes) and PW40 (14.7 minutes, p =  
35 0.0044 (95%CI -12 to -2.2), PW40 and NW (6.0 minutes, p = 0.003 (95%CI 1.8 to 8.7)  
36 and PW1% and PW40 (p = 0.004, 95%CI -12 to -2.2). The rate of heat loss in the pre-  
37 warmed groups exceed that of the NW group: PW1% versus NW (p = 0.005, 95%CI  
38 0.004 to 0.027), PW40 *versus* NW (p < 0.0001, 95%CI 0.014 to 0.036) and PW1%  
39 *versus* PW40 (p = 0.07, 95%CI -0.021 to 0.00066). Pre-warming alone confers a  
40 protective effect against hypothermia during volatile anesthesia; however, longer duration  
41 procedures would require additional heating support.

## 42 **Introduction**

43 Hypothermia remains a common complication encountered in both human and veterinary  
44 anesthesia. [1-5] Heat loss during general anesthesia is affected by various patient and  
45 environmental factors. Those related to the patient include severity of disease, and  
46 intervention planned (e.g. open body cavities). [3, 4] Factors related to the environment  
47 include exposure to fluids and surfaces at temperatures below core body temperature and  
48 continual circulation of cool air in the environment. [6] Critically, though these factors  
49 contribute to perianesthetic hypothermia, the most important mechanism of hypothermia  
50 during general anesthesia is the redistribution of warm blood from the core to the  
51 periphery. [7] This explains why hypothermia begins so rapidly after induction of general  
52 anesthesia (before surgery begins) and the difficulty in its prevention or reversal. [8, 9]  
53 Body temperature is considered a vital sign and hypothermia can have important adverse  
54 effects. In humans, a small decrease in core temperature, as little as 1°C, is associated  
55 with prolonged recovery and hospitalisation, increased surgical site infection and  
56 contributes to post-operative pain. [10-12] While the known consequences of  
57 hypothermia in the veterinary literature are currently limited, delayed recovery from  
58 anesthesia has been shown in both dogs and rats. [13, 14]  
59 In mammals, core temperature is normally tightly regulated within a narrow range, the  
60 inter-threshold range, that spans  $\pm 0.3^{\circ}\text{C}$ . General anesthesia impairs thermoregulation  
61 through depression of the hypothalamus, the major thermoregulatory center in the brain.  
62 As a result, the inter-threshold range increases 10-20 fold, allowing core body  
63 temperature to decrease substantially before corrective measures (vasoconstriction,

64 arterio-venous shunting) begin. Depression of thermoregulation in addition to  
65 vasodilation induced by many anesthetic agents allows heat to flow down the temperature  
66 gradient from the core to peripheral tissues. [15, 16] In general, core temperature follows  
67 a distinct pattern during general anesthesia that consists of three phases: 1) redistribution  
68 of heat from the core to the periphery, which accounts for approximately 80% of  
69 hypothermia during the first hour of anesthesia, 2) a further decrease in core temperature  
70 as heat loss exceeds metabolic heat production in the subsequent 2-3 hours and 3)  
71 achieving a plateau in temperature over 3-4 hours as core temperature falls low enough  
72 for vasoconstriction to occur and reduce metabolic heat loss to the periphery. [7, 17]

73 Understanding the mechanism of hypothermia during anesthesia has led to the successful  
74 practice of pre-warming human patients before induction of anesthesia. [18] The goal of  
75 pre-warming is to raise the temperature of the periphery so that the temperature gradient  
76 with the core is lessened, thereby delaying the decrease in core temperature as  
77 thermoregulatory mechanisms are depressed. [19] Previous work has shown potential for  
78 pre-warming to be effective in rodents. [20]

79 The primary objective of this study was to assess different pre-warming temperature  
80 regimens on core temperature during general anesthesia. We hypothesized that pre-  
81 warming animals before induction of general anesthesia would delay the onset of  
82 hypothermia. A secondary objective was to compare the accuracy of different  
83 temperature measurement sites to core temperature (telemetric capsules implanted in the  
84 abdomen).

## 85 **Materials and Methods**

### 86 **Animals**

87 Adult female (n = 10) and male (n = 7) CD Sprague–Dawley rats were obtained from a  
88 commercial supplier (Charles River Laboratories, Senneville, QC, Canada). Rats weighed  
89 308 - 412 g (females; age 19-27 weeks old) and 220-576 g (males; age 7-11 weeks old) at  
90 the start of the experiment.

### 91 **Ethics statement**

92 Study review and approval was provided by the local animal care and use committee of  
93 the Université de Montréal (protocol ID 18-Rech-1947), operating under the auspices of  
94 the Canadian Council on Animal Care.

95 Rats were acclimatized to the environment (warming chamber) and experimenter (MR)  
96 for 7 days before the experiment. Rats were considered habituated when they readily  
97 accepted a treat offered by hand while in the anesthesia induction box. Rats were pair  
98 housed in a plastic cage (45 [l] x 24 [w] x 20 [h] cm) with wood chip and shredded paper  
99 bedding and a plastic tube for enrichment. The housing environment was controlled:  
100 14h/10h light/dark cycle (lights on at 06:00), temperature (22°C) and humidity (20-25%).  
101 Food (Rodent laboratory chow 5075, Charles River Breeding Laboratories, St-Constant,  
102 Quebec, Canada) and tap water were provided *ad libitum*. Small treats were also offered  
103 *ad hoc* during the project (Supreme Mini-Treats™, Very berry flavor, Bio-Serv,  
104 Flemington, NJ 08822, USA; Veggie-Bites™, Bio-Serv, Flemington, NJ 08822, USA;  
105 Fruit Crunchies, Bio-Serv, Flemington, NJ 08822, USA).

106 The project had two phases: 1. Temperature capsule instrumentation surgery and 2. Pre-  
107 warming temperature experiment. Sample size was estimated *a priori* with an alpha level  
108 of 0.05 and power of 90% (G\*Power 3.1.9.2, Germany). The target mean difference was  
109 0.5°C in core temperature with a standard deviation of 0.4°C. This was based on the  
110 results of a similar project, giving an estimated sample size of 15 rats per treatment  
111 group. [20]

## 112 **Telemetric temperature capsule implantation**

113 On the day of surgery, telemetry capsules (Anipill temperature sensor; Aniview system®,  
114 Bodycap, Hérouville-Saint-Clair, France) were activated and accuracy confirmed by  
115 immersion in water baths at 35°C and 37°C: bath temperature was checked with a  
116 calibrated infrared thermometer (Fluke infrared thermometer 561, Fluke Corporation,  
117 Everett, WA, USA; calibrated at 30°C, 45°C and 60°C with an accuracy of +/- 0.1°C).  
118 Temperature capsules were sterilised (chlorhexidine gluconate 0.05% immersion for 30  
119 minutes) and rinsed with sterile saline (0.9% NaCl) before implantation.

120 All surgeries were completed between 17:00 and 20:00. Approximately 30 minutes  
121 before surgery, each rat was given meloxicam (2 mg/kg SC, Metacam, 5 mg/mL;  
122 Boehringer Ingelheim Vetmedica, Inc, St Joseph, MO, USA) and buprenorphine (0.03  
123 mg/kg SC, Vetergesic, 0.3 mg/mL; Champion Alstoe, Whitby, ON, Canada). Rats were  
124 anesthetized individually in an induction chamber (25.7 [l] x 11 [w] x 10.7 [h] cm; Small  
125 box, Harvard apparatus, Holliston, Massachusetts, USA) and the isoflurane vaporizer dial  
126 set at 5% in 1 L/min of oxygen until loss of the righting reflex, at which time the rat was  
127 removed from the chamber and placed in dorsal recumbency on a heat pad (16 × 38 cm;

128 Stoelting Rodent Warmer with Cage Heating Pad, Stoelting Corporation, Wood Dale, IL)  
129 with an output maintained at approximately 37°C. General anesthesia was maintained via  
130 nose cone with the isoflurane vaporizer set at approximately 1.75%, carried in 1 L/min  
131 oxygen.

132 Fur was clipped from the xiphoid process to the pubis and the skin was cleaned with  
133 alcohol and chlorhexidine. A celiotomy was performed with a 15 mm incision, beginning  
134 immediately caudal to the umbilicus. The temperature capsule was positioned freely in  
135 the peritoneal cavity and the surgical incision closed in two layers. At completion of  
136 surgery, the vaporizer was turned off and the rat allowed to recover with 1 L/min of  
137 oxygen on the heating pad. The rat was returned to its home cage following return of  
138 sternal recumbency. Meloxicam (2mg/kg SC) was administered 24 and 48 hours post-  
139 operatively and a food supplement (DietGel Recovery; Clear H<sub>2</sub>O, Portland, ME, USA)  
140 provided in addition to food for the following 7 days. Only rats displaying a positive  
141 weight gain proceeded to the second (temperature experiment) phase. The exclusion  
142 criteria from the experiment in the post-operative period consisted of: weight loss,  
143 telemetric implant failure, lethargy, pain/infection or complication at the surgical site.

## 144 **Pre-warming temperature experiment**

145 The pre-warming experiment was conducted 7 days after capsule instrumentation. A  
146 prospective cross-over study was conducted, with animals receiving 3 treatments.  
147 Treatment 1 (PW1%): pre-warming to a target of 1% increase in core (capsule) body  
148 temperature from baseline. Treatment 2 (PW40): pre-warming to a target core  
149 temperature of 40°C. Treatment 3 (NW): no pre-warming control group. A core

150 temperature was established for each animal by averaging temperatures recorded between  
151 08:00 and 18:00 the day before the temperature experiment. From this, each rat's  
152 individual hypothermia threshold was determined (mean core temperature minus two  
153 standard deviations) and used to identify time to hypothermia.[20] Baseline core  
154 temperature from all rats were pooled to facilitate general comparisons between  
155 treatments. The hypothermia threshold was determined in the same way for pooled data.  
156 The PW1% treatment was performed first as a proof of concept and to ensure there were  
157 no adverse behavioral effects of warming before randomising treatment order  
158 ([www.random.org](http://www.random.org)) to the PW40 and NW treatments. A washout period of at least 5 days  
159 was allowed between experiments. The study design and single experimenter (MR)  
160 during data collection precluded blinding to treatment. Rats were video-recorded when in  
161 the warming chamber (25.7 [l] x 11 [w] x 10.7 [h] cm) for all treatment groups and  
162 videos reviewed by an observer blinded to treatment (VL) for signs of behaviors  
163 associated with potential distress. Behavioral signs were assessed at two timepoints: 1)  
164 the first three minutes after the rats were placed in the chamber and 2) last three minutes  
165 (before isoflurane was started). The presence of the following behaviors were recorded:  
166 pawing or digging, open mouth breathing, abnormal posture (i.e. hunched back or head  
167 pressed into corner), audible vocalisations, chromodacryorrhea and rearing. [21, 22] The  
168 direction faced (towards or away from the heat source) was also assessed.

169 Criteria to withdraw an animal from the temperature experiment were: cutaneous thermal  
170 injury and a core temperature  $< 27^{\circ}\text{C}$  or  $> 41^{\circ}\text{C}$ .

171 Experiments were conducted between 09:00 - 17:00. Core temperature was recorded  
172 every 2.5 minutes in all treatment groups. The following proxy temperatures were also



173 monitored every 5 minutes in all groups: 1. lateral tail base, 2. fur temperature (at the  
174 xyphoid process) and 3. rectal temperature (rectal thermometer inserted 6 cm into rectum,  
175 Physio Logic Accuflex Pro, Model 16-639; AMG Medical, Montreal, QC, Canada).  
176 Rectal thermometer accuracy was confirmed as described for the telemetry capsules and a  
177 correction factor applied as necessary. Proxy temperatures were recorded from the loss of  
178 righting reflex, as soon as rats were taken out of the warming chamber, until core  
179 temperature achieved a nadir of approximately 34°C. Additionally, skin temperature at  
180 the level of the elbow and knee (right thoracic and pelvic limb, respectively) was  
181 measured with the infrared thermometer just before entry and as soon as rats were taken  
182 out the warming chamber.

### 183 **Warming chamber heating unit**

184 The warming chamber heating unit (Vetronic Services Ltd, England) consisted of an in-  
185 line electrically heated device and an electronic controller. Located within a 10 cm pipe  
186 fitted with 22 mm male connectors, four heating coils provide heat to the fresh gas  
187 supplied directly from the fresh gas outlet of anaesthetic machine. Temperature sensors  
188 within the heating unit provide information on the exit temperature of the fresh gas. By  
189 means of a microprocessor, the heating effect was varied to maintain a constant exit  
190 temperature with varying fresh gas flow. Auxiliary temperature sensors provided  
191 information on air temperatures in the warming chamber. The heating unit was placed  
192 between the distal end of the anesthetic circuit and the entry port to the warming  
193 chamber. Due to heat losses from the warming chamber itself, the temperature of the  
194 incoming gas was higher than the target patient temperature.

195 **PW1% group**

196 The warming chamber was heated for 35 minutes before rat entry to achieve a box  
197 temperature of  $34.4 \pm 1.6^{\circ}\text{C}$ . Chamber heating continued after a rat was introduced to the  
198 chamber until core temperature increased by 1% over baseline for each animal. Once the  
199 target temperature was achieved, general anesthesia was induced with 5% isoflurane in  
200 oxygen at 1L/min. At loss of righting reflex, the rat was removed from the warming  
201 chamber and placed on an absorbent pad (17" x 24", Ultra Blok, A.M.G. Medical Inc.  
202 Montreal, QC) with no further active heat source and core temperature allowed to  
203 decrease to below the hypothermic threshold.

204 **PW40 group**

205 The methods was as described for the PW1% group, except that the target core  
206 temperature was  $40.0^{\circ}\text{C}$  before beginning general anesthesia.

207 **NW group**

208 Rats were placed in the warming chamber for 10 minutes (based on the initial PW1%  
209 experiment time within warming chamber) with the same oxygen flow rate as during the  
210 PW1% and PW40 treatments. No heat was provided and anesthesia maintained until core  
211 temperature decreased below the hypothermic threshold.

212 **Statistical analysis**

213 Data were analysed with commercial software (Prism 8.1.2, GraphPad Software, La Jolla,  
214 CA, USA and MedCalc Software 18.5, Ostend, Belgium). All data approximated a  
215 normal distribution according to the D'Agostino-Pearson Omnibus normality test. Time

216 to hypothermia (individualised to each rat) was assessed with a repeated measures 1-way  
217 ANOVA (post-hoc Tukey). The effectiveness of the different treatments were assessed  
218 with an area under the curve. Curve limits were set as start of anesthesia (time 0) and  
219 onset of hypothermia. The area under the curve was assessed with a 1-way ANOVA  
220 (post-hoc Tukey test). Agreement between different temperature measurement sites and  
221 core temperature were evaluated with a Bland-Altman analysis for repeated measures  
222 with data pooled from the three treatment groups. The criterion method (core  
223 temperature) was subtracted from the other measurements (tail, fur and rectal).  
224 Differences between treatment groups in the percentage of time spent facing the heat  
225 source was assessed with a mixed-effect analysis (post-hoc Tukey test). p-values of <  
226 0.05 were considered significant. Data are presented as mean  $\pm$  SD in the text and mean  $\pm$   
227 SEM or median  $\pm$  10-90 percentile in the figures. Data supporting the results are  
228 available in an electronic repository (Harvard Dataverse): xxx.

## 229 **Results**

230 None of the pre-established exclusion criteria was met during the experiment and each rat  
231 completed all experiments (n = 17 / group). Nine video files were corrupted and  
232 therefore, behavioural observations could not be completed for these animals (PW1%: n  
233 = 8, PW40: n = 1). Additionally, one rat from the PW1% group was excluded from  
234 behavioural analysis as an outlier: its behavior differed from all other animals in spending  
235 83% of the time facing the heat source.

236 The mean core temperature of all rats during baseline (day before experimentation) was  
237  $37.2 \pm 0.17$  °C. Therefore, an overall hypothermia threshold value of 36.9°C. Pre-

238 warming was successful in increasing core temperature while in the warming chamber.  
239 The time to increase core temperature by 1% or to 40°C was  $11 \pm 5.1$  and  $23 \pm 5.3$   
240 minutes, respectively. The mean core temperatures of the PW1%, PW40 and NW groups  
241 at time 0 were  $38.5 \pm 0.6$ ,  $39.6 \pm 0.2$  and  $37.9 \pm 0.4$ °C, respectively. Pre-warming was  
242 also effective in raising skin temperature, with an increase from baseline of  $4.8 \pm 1.6$ °C  
243 for the PW1% group and  $3.4 \pm 1.2$ °C for the PW40 °C group. The NW group had a small  
244 increase in skin temperature when placed in the warming chamber of  $1.6$ °C  $\pm$   $1.1$ °C. The  
245 core body temperatures of all rats reduced when warming was stopped, and anesthesia  
246 started (Fig 1).

247

248 **Fig 1. Core temperature changes in rats pre-warmed to 40°C (PW40, n = 17), 1%**  
249 **above baseline temperature (PW1%, n = 17) or without warming (NW, n = 17). Time**  
250 **spent in warming chamber is highlighted in red (time -35 to 0 mins), followed by**  
251 **induction of general anesthesia and removal from warming chamber (green box, time 0 to**  
252 **50 mins). Time taken to reach hypothermia threshold (36.9°C, horizontal dotted line) was**  
253 **6.1, 11.1 and 14.7 mins for NW, PW1% and PW40 groups, respectively. Before time 0,**  
254 **data are plotted every 5 minutes for clarity. Data presented as mean  $\pm$  SEM.**

255

256

257

## 258 **Area under the curve during temperature reduction**

259 Increasing core temperature before the onset of general anesthesia was associated with a  
260 significantly greater area under the curve until hypothermia was reached. Significant

261 differences between areas under the curve was found between all treatment groups:

262 PW1% vs NW ( $p = 0.0108$ , 95% CI of difference, -14 to -1.4), PW1% to PW 40 ( $p <$

263  $0.0001$ , -17 to -5.7) and PW40 to NW ( $p < 0.0001$ , -25 to -13; Fig 2).

264

265

266 **Fig 2. Area under the curve during temperature reduction.** Horizontal dotted line

267 represents the hypothermia threshold ( $36.9^{\circ}\text{C}$ ). PW40 = pre-warmed to  $40^{\circ}\text{C}$  core

268 temperature ( $n = 17$ ). PW1% = pre-warmed to 1% above baseline core temperature ( $n =$

269 17). NW = no external warming provided ( $n = 17$ ). Data presented as mean  $\pm$  SEM.

270

### 271 **Time to reach individual hypothermia threshold**

272 Pre-warming had a significant effect on the time to reach the hypothermia threshold.

273 Times to reach the hypothermia threshold were 5.95, 11.2 and 14.7 minutes for treatment

274 groups NW, PW1% and PW40, respectively. These times were significantly different

275 between each treatment group: PW1% *versus* PW40 ( $p = 0.004$ , 95%CI -12 to -2.2),

276 PW40 *versus* NW ( $p < 0.0001$ , 95%CI 8.1 to 16), PW1% *versus* NW ( $p = 0.003$ , 95%CI

277 1.8 to 8.7, Fig 3).

278

279

280 **Fig 3. Time to reach individual hypothermia threshold.** The no-warming (NW,  $n =$

281 17) group reached their individual hypothermia threshold more quickly than the pre-

282 warming to 1% above baseline core temperature (PW1%,  $n = 17$ ) ( $p < 0.01$ ) and pre-

283 warming to 40°C (PW40, n = 17) ( $p < 0.0001$ ) groups. The PW1% group reached their  
284 individual hypothermia threshold more quickly than the PW40 group ( $p < 0.0001$ ). Data  
285 presented as mean  $\pm$  SEM. \*\* $p < 0.01$ . \*\*\*\* $p < 0.0001$ .

286

## 287 **Comparisons of different temperature measurements**

288 Rectal temperatures approximated core temperatures (bias -0.20°C, 95% limits of  
289 agreement -4.3 to 4.0; Fig 4). Fur and tail temperatures underestimated core temperatures  
290 (fur: bias -2.5°C, 95% limits of agreement -6.6 to 1.7 Fig 5; tail: bias -7.8°C, 95%  
291 limits of agreement -15.3 to -0.30; Fig 6).

292

### 293 **Fig 4. Bland-Altman plot of repeated measures comparing rectal and core**

294 **temperatures.** Rectal temperature underestimates core temperatures by 0.20°C, with  
295 95% limits of agreement ranging from -4.3 to 4.0. Data were pooled from the three  
296 treatment groups.

### 297 **Fig 5. Bland-Altman plot of repeated measures comparing fur and core temperatures.**

298 Fur temperature underestimates core temperature by 2.50°C, with 95% limits of  
299 agreement ranging from -6.7 to 1.7. Data were pooled from the three treatment groups.

### 300 **Fig 6. Bland-Altman plot of repeated measures comparing tail and core**

301 **temperatures.** Tail temperature underestimates core temperature by -7.80°C, with 95%  
302 limits of agreement ranging from -15.3 to -0.3. Data were pooled from the three treatment  
303 groups.

304

## 305 **Behavioural assessment**

306 During both timepoints evaluated, rats that were prewarmed preferred to face away from  
307 the heat source during both three-minute intervals (Fig 7). During the first and last three  
308 minutes of observation, NW animals did not display a position preference and were more  
309 likely to face the heat source in comparison to PW1% (first 3 mins:  $p = 0.0005$ , 95%CI  
310 28.3 to 68.1; last 3 mins:  $p = 0.009$ , 95%CI 15.1 to 80.5) and PW40 (first 3 mins:  $p =$   
311  $0.003$ , 95%CI 11.2 to 53.5; last 3 mins:  $p = 0.016$ , 95%CI 6.5 to 63.2). During the first  
312 three minutes, PW40 animals were more likely to face the heat source than PW1%  
313 animals ( $p = 0.016$ , 95%CI 3.59 to 28.2). A low incidence of digging behaviour was  
314 observed in both PW1% ( $n = 2/9$ ) and PW40 ( $n = 3/16$ ) groups, which was only  
315 displayed during the second observation period (end of warming period).

316 Chromodacryorrhoea was observed in two rats that displayed digging behavior in the  
317 PW40 group. Neither digging behaviour nor the occurrence of chromodacryorrhoea were  
318 evident in the NW group. No other abnormal behaviours were observed.

319

320 **Fig 7. Percentage of time rats faced the heat source.** The no-warming (NW,  $n = 17$ )  
321 group spent approximately 50% of the time facing the heat source and this was  
322 significantly longer than the pre-warming to 1% above baseline core temperature  
323 (PW1%,  $n = 17$ ) and pre-warming to 40°C (PW40,  $n = 17$ ) groups during the first and last  
324 3 mins of observation ( $p < 0.05$ ). During the first three minutes, the PW40 group was  
325 more likely to face the heat source than PW1% ( $p < 0.05$ ). Data presented as median  $\pm$   
326 10-90 percentile. \* $p < 0.05$ . \*\* $p < 0.01$ . \*\*\* $p < 0.001$ .

327

## 328 **Discussion**

329 The main findings of this study are that pre-warming is effective at delaying the onset of  
330 hypothermia during general anesthesia. This was achieved by increasing skin and core  
331 temperatures. Following pre-warming, the rate of temperature loss was slightly faster  
332 than without pre-warming. Additionally, the accuracy and agreement of tail and fur  
333 temperature, as proxies of core temperature, was poor, whereas rectal temperature  
334 showed good agreement with core temperature.

335 The consequences of hypothermia are well documented in human medicine, with a  
336 decrease in core temperature of 1°C linked to significant adverse outcomes. These  
337 include increased surgical site infection, hemorrhage, impaired immune function, thermal  
338 discomfort and prolonged recovery and hospitalisation. [11, 23-28] In laboratory mice,  
339 warming animals between injection of anesthetic agents and induction of anesthesia  
340 resulted in reduced data variability. [29]

341 Despite these known adverse effects, hypothermia remains a common perianesthetic  
342 complication in both human and veterinary medicine. Recent studies have documented  
343 incidence rates as high as 84-97% in cats and dogs undergoing a variety of procedures.  
344 [1, 3, 4] Good temperature management is a key element in optimal recovery from  
345 surgery and is included in the concept of Enhanced Recovery After Surgery (ERAS), a  
346 perioperative management strategy applied in human medicine to optimise recovery  
347 (return to normal function) without compromising pain management. [30, 31] ERAS is in  
348 its infancy in veterinary medicine. [32-34]



349 In mammals, core body temperature is normally closely regulated by the hypothalamus,  
350 maintaining core temperature within  $\pm 0.3^{\circ}\text{C}$  through various autonomic and behavioral  
351 mechanisms. General anesthesia (injectable and volatile anesthetics) prevents heat-  
352 seeking behaviors, inhibits heat-producing activities (i.e. shivering) and loosens the  
353 regulation of core temperature so that fluctuations in core temperature of  $3\text{-}6^{\circ}\text{C}$  are  
354 permitted. Protective strategies against hypothermia are impaired: vasoconstriction does  
355 not occur until a lower temperature is attained and there is a loss of control over  
356 arteriovenous shunting. [15, 35, 36]

357

358 Inhibition of thermoregulation promotes a major redistribution of heat from the core to  
359 the periphery, explaining the rapid drop in core temperature noted during the first hour of  
360 general anesthesia. [7] This rapid onset of hypothermia is well documented in both rats  
361 and mice. [14, 20, 37]

362 The concept of pre-warming patients was introduced in humans on the basis that  
363 increasing peripheral temperature before general anesthesia would limit temperature  
364 redistribution from the core to the periphery, subsequently delaying hypothermia. [18]  
365 This was successfully achieved by raising skin temperatures by approximately  $4$  to  $5^{\circ}\text{C}$ ,  
366 an increase associated with small increases in core temperature ( $0.3\text{-}0.5^{\circ}\text{C}$ ). [19] When  
367 coupled with intra-operative warming, this strategy was effective at preventing  
368 hypothermia. [38-40]

369 The literature on perianesthetic temperature management in rodents is limited, with a  
370 focus on warming after general anesthesia is induced. [37, 41, 42] However, recent  
371 preliminary work has shown that pre-warming can be effective. Warming an anesthetic

372 induction box before and during induction of general anesthesia with isoflurane in rats  
373 (box temperature  $35.7 \pm 3.5^{\circ}\text{C}$  to  $37.5 \pm 2.6^{\circ}\text{C}$ ) was successful in maintaining core  
374 temperature above baseline during 40 minutes of general anesthesia in conjunction with  
375 active warming using a heat pad (set at  $40^{\circ}\text{C}$ ); however, this study did not investigate the  
376 effects of pre-warming in isolation. [20]

377

378 The PW1% group was determined based on human literature, which shows an increase in  
379 core temperature of approximately 1% above baseline to be effective in preventing core  
380 to periphery heat redistribution. [19, 40] The PW40 treatment was selected to assess the  
381 effect of warming to a higher core temperature on behavior and temperature maintenance.  
382 An upper limit of  $40^{\circ}\text{C}$  was selected as core temperatures in mice of  $41.5 \pm 0.1^{\circ}\text{C}$  for 2  
383 hours resulted in apoptosis. [43]

384 Pre-warming was successful in delaying the onset of hypothermia, which took  
385 approximately 2.5 times longer to occur in the PW40 group and 1.5 times longer in the  
386 PW1% group compared with the NW group. Overall, pre-warming conferred protection  
387 against hypothermia for approximately 15 minutes without additional warming, a  
388 duration suitable for short procedures. Beyond this period, normothermia could be simply  
389 maintained with active warming and appropriate warming during recovery, as previously  
390 shown [20, 44]. As has been reported in humans, the rate of heat loss following induction  
391 of anesthesia was greater than in the pre-warmed than in the NW animals, reflecting the  
392 temperature gradient to the environment. [9, 45]

393 The use of telemetry capsules placed within the peritoneal cavity has the advantages of  
394 accurately reflecting core temperature and allowing remote monitoring. [46] However, it

395 is clearly not a practical approach for routine monitoring. Therefore, several other  
396 temperatures were recorded for comparison against core temperature. Rectal temperature  
397 performed well, with values acceptably close to core temperature. This is in line with  
398 previous work showing a similar bias and limits of agreement between rectal and core  
399 temperatures: bias;  $-0.9^{\circ}\text{C}$ , limits of agreements;  $0.1$  to  $-1.9^{\circ}\text{C}$ . [20] Importantly, rectal  
400 temperature accuracy is dependent on thermometer insertion depth. [47] In contrast to  
401 rectal temperature, fur and tail temperature performed poorly.

402 The behavioral analyses were equivocal. Though rats in the pre-warmed groups showed a  
403 clear preference for facing away from the heat source, overt signs of distress were rarely  
404 displayed. Nonetheless, further investigation is required to characterise the presence and  
405 severity of stress. A larger warming chamber that would allow rats to move away from  
406 the heat source may be preferable.

## 407 **Limitations**

408 This study had several limitations. The study was limited to a single volatile anesthetic;  
409 therefore, the role of pre-warming during injectable anesthetic drug use remain unknown.  
410 There was no measurement of air humidity or velocity in the warming chamber; both  
411 factors affect heat loss through evaporation [48]. Finally, the study design was limited to  
412 a simple procedure performed in healthy animals. While the general principles are  
413 unlikely to change, the rate and degree of heat loss during invasive procedures (entering a  
414 body cavity) or in systemically sick animals are likely to differ.

## 415 **Conclusion**

416 Pre-warming alone is effective in delaying hypothermia in rats anesthetized with  
417 isoflurane. The duration of effect was short, necessitating temperature support for longer  
418 anesthetic periods. Rectal temperature measurement is an acceptable proxy for core  
419 temperature, unlike fur and tail temperature. Further research is needed to establish  
420 temperature profiles and optimal temperature management during surgery and in sick  
421 animals.

## 422 **Acknowledgements**

423 The authors thank Dr Guy Beauchamp (Université de Montréal) for statistical advice.

## 424 **Funding**

425 Natural Sciences and Engineering Research Council (NSERC) Discovery Grant (ID:  
426 424022-2013; DSJP), Fondation Lévesque (DSJP). The funders had no role in study  
427 design, data collection and analysis, decision to publish, or preparation of the manuscript.

## 428 **References**

- 429 1. Rose N, Kwong GP, Pang DS. A clinical audit cycle of post-operative hypothermia in dogs.  
430 The Journal of small animal practice. 2016;57(9):447-52. Epub 2016/09/07. doi:  
431 10.1111/jsap.12547. PubMed PMID: 27593195.
- 432 2. Kleimeyer JP, Harris AHS, Sanford J, Maloney WJ, Kadry B, Bishop JA. Incidence and Risk  
433 Factors for Postoperative Hypothermia After Orthopaedic Surgery. J Am Acad Orthop Surg.  
434 2018;26(24):e497-e503. Epub 2018/09/01. doi: 10.5435/JAAOS-D-16-00742. PubMed PMID:  
435 30169443.
- 436 3. Redondo JI, Suesta P, Gil L, Soler G, Serra I, Soler C. Retrospective study of the  
437 prevalence of postanaesthetic hypothermia in cats. Vet Rec. 2012;170(8):206. Epub 2011/11/30.  
438 doi: 10.1136/vr.100184. PubMed PMID: 22124024.
- 439 4. Redondo JI, Suesta P, Serra I, Soler C, Soler G, Gil L, et al. Retrospective study of the  
440 prevalence of postanaesthetic hypothermia in dogs. Vet Rec. 2012;171(15):374. Epub  
441 2012/08/28. doi: 10.1136/vr.100476. PubMed PMID: 22922707.

- 442 5. Castillo Monzón CG, Candia Arana CA, Marroquín Valz HA, Aguilar Rodríguez F,  
443 Benavides Mejía JJ, Alvarez Gómez JA. Temperature management during the perioperative  
444 period and frequency of inadvertent hypothermia in a general hospital. *Colombian Journal of*  
445 *Anesthesiology*. 2013;41(2):97-103. doi: 10.1016/j.rcae.2013.03.002.
- 446 6. Sessler DI. Perioperative heat balance. *Anesthesiology*. 2000;92(2):578-96. doi:  
447 10.1097/00000542-200002000-00042. PubMed PMID: WOS:000085078600038.
- 448 7. Matsukawa T, Sessler DI, Sessler AM, Schroeder M, Ozaki M, Kurz A, et al. HEAT-FLOW  
449 AND DISTRIBUTION DURING INDUCTION OF GENERAL-ANESTHESIA. *Anesthesiology*.  
450 1995;82(3):662-73. doi: 10.1097/00000542-199503000-00008. PubMed PMID:  
451 WOS:A1995QK90500009.
- 452 8. Hynson JM, Sessler DI. Intraoperative warming therapies: a comparison of three devices.  
453 *Journal of clinical anesthesia*. 1992;4(3):194-9. Epub 1992/05/01. PubMed PMID: 1610573.
- 454 9. Hynson JM, Sessler DI, Moayeri A, McGuire J, Schroeder M. THE EFFECTS OF  
455 PREINDUCTION WARMING ON TEMPERATURE AND BLOOD-PRESSURE DURING PROPOFOL  
456 NITROUS-OXIDE ANESTHESIA. *Anesthesiology*. 1993;79(2):219-28. doi: 10.1097/00000542-  
457 199308000-00005. PubMed PMID: WOS:A1993LP76100004.
- 458 10. Sun Z, Honar H, Sessler DI, Dalton JE, Yang DS, Panjasawatwong K, et al. Intraoperative  
459 Core Temperature Patterns, Transfusion Requirement, and Hospital Duration in Patients  
460 Warmed with Forced Air. *Anesthesiology*. 2015;122(2):276-85. doi:  
461 10.1097/aln.0000000000000551. PubMed PMID: WOS:000351734900007.
- 462 11. Kurz A, Sessler DI, Narzt E, Bekar A, Lenhardt R, Heumer G, et al. POSTOPERATIVE  
463 HEMODYNAMIC AND THERMOREGULATORY CONSEQUENCES OF INTRAOPERATIVE CORE  
464 HYPOTHERMIA. *Journal of clinical anesthesia*. 1995;7(5):359-66. doi: 10.1016/0952-  
465 8180(95)00028-g. PubMed PMID: WOS:A1995RR07100001.
- 466 12. Bindu B, Bindra A, Rath G. Temperature management under general anesthesia:  
467 Compulsion or option. *J Anaesthesiol Clin Pharmacol*. 2017;33(3):306-16. Epub 2017/11/08. doi:  
468 10.4103/joacp.JOACP\_334\_16. PubMed PMID: 29109627; PubMed Central PMCID:  
469 PMCPMC5672515.
- 470 13. Pottie RG, Dart CM, Perkins NR, Hodgson DR. Effect of hypothermia on recovery from  
471 general anaesthesia in the dog. *Aust Vet J*. 2007;85(4):158-62. Epub 2007/04/03. doi:  
472 10.1111/j.1751-0813.2007.00128.x. PubMed PMID: 17397389.
- 473 14. Caro AC, Hankenson FC, Marx JO. Comparison of Thermoregulatory Devices Used during  
474 Anesthesia of C57BL/6 Mice and Correlations between Body Temperature and Physiologic  
475 Parameters. *J Amer Assoc Lab Anim Sci*. 2013;52(5):577-83. PubMed PMID:  
476 WOS:000340810400011.
- 477 15. Matsukawa T, Kurz A, Sessler DI, Bjorksten AR, Merrifield B, Cheng C. PROPOFOL  
478 LINEARLY REDUCES THE VASOCONSTRICTION AND SHIVERING THRESHOLDS. *Anesthesiology*.  
479 1995;82(5):1169-80. doi: 10.1097/00000542-199505000-00012. PubMed PMID:  
480 WOS:A1995QW58700014.
- 481 16. Xiong JY, Kurz A, Sessler DI, Plattner O, Christensen R, Dechert M, et al. Isoflurane  
482 produces marked and nonlinear decreases in the vasoconstriction and shivering thresholds.  
483 *Anesthesiology*. 1996;85(2):240-5. doi: 10.1097/00000542-199608000-00003. PubMed PMID:  
484 WOS:A1996VB44200004.
- 485 17. Kurz A, Sessler DI, Christensen R, Dechert M. Heat balance and distribution during the  
486 core-temperature plateau in anesthetized humans. *Anesthesiology*. 1995;83(3):491-9. Epub  
487 1995/09/01. PubMed PMID: 7661349.

- 488 18. Torossian A. Thermal management during anaesthesia and thermoregulation standards  
489 for the prevention of inadvertent perioperative hypothermia. *Best Practice & Research Clinical*  
490 *Anaesthesiology*. 2008;22(4):659-68. doi: 10.1016/j.bpa.2008.07.006.
- 491 19. Sessler DI, Schroeder M, Merrifield B, Matsukawa T, Cheng C. OPTIMAL DURATION AND  
492 TEMPERATURE OF PREWARMING. *Anesthesiology*. 1995;82(3):674-81. doi: 10.1097/0000542-  
493 199503000-00009. PubMed PMID: WOS:A1995QK90500010.
- 494 20. Schuster CJ, Pang DSJ. Forced-air pre-warming prevents peri-anaesthetic hypothermia  
495 and shortens recovery in adult rats. *Lab Anim*. 2018;52(2):142-51. Epub 2017/06/11. doi:  
496 10.1177/0023677217712539. PubMed PMID: 28599579.
- 497 21. Canadian Council on Animal Care. CCAC training module on: pain distress and endpoints  
498 companion notes. [Internet]. 2011. [cited 2019 June 4]. Available from:  
499 <https://www.ccac.ca/Documents/Education/Modules/Vivaria/Endpoints/Companion-notes.pdf>.
- 500 22. National Institutes of Health Office of Animal Care and Use. Guidelines for Pain and  
501 Distress in Laboratory Animals: Responsibilities, Recognition and Alleviation. [internet]. 2015.  
502 [cited 2019 June 4]. Available from: [https://oacu.oir.nih.gov/sites/default/files/uploads/arac-](https://oacu.oir.nih.gov/sites/default/files/uploads/arac-guidelines/pain_and_distress.pdf)  
503 [guidelines/pain\\_and\\_distress.pdf](https://oacu.oir.nih.gov/sites/default/files/uploads/arac-guidelines/pain_and_distress.pdf).
- 504 23. Hildebrand F, Giannoudis PV, van Griensven M, Chawda M, Pape HC. Pathophysiologic  
505 changes and effects of hypothermia on outcome in elective surgery and trauma patients. *Am J*  
506 *Surg*. 2004;187(3):363-71. Epub 2004/03/10. doi: 10.1016/j.amjsurg.2003.12.016. PubMed  
507 PMID: 15006564.
- 508 24. Kurz A, Sessler DI, Lenhardt R. Perioperative normothermia to reduce the incidence of  
509 surgical-wound infection and shorten hospitalization. *New England Journal of Medicine*.  
510 1996;334(19):1209-15. doi: 10.1056/nejm199605093341901. PubMed PMID:  
511 WOS:A1996UJ05400001.
- 512 25. Reynolds L, Beckmann J, Kurz A. Perioperative complications of hypothermia. *Best*  
513 *Practice & Research Clinical Anaesthesiology*. 2008;22(4):645-57. doi:  
514 10.1016/j.bpa.2008.07.005.
- 515 26. Schmied H, Kurz A, Sessler DI, Kozek S, Reiter A. Mild hypothermia increases blood loss  
516 and transfusion requirements during total hip arthroplasty. *Lancet*. 1996;347(8997):289-92. doi:  
517 10.1016/s0140-6736(96)90466-3. PubMed PMID: WOS:A1996TT48500009.
- 518 27. Scott EM, Buckland R. A systematic review of intraoperative warming to prevent  
519 postoperative complications. *AORN journal*. 2006;83(5):1090-104, 107-13. Epub 2006/05/26.  
520 PubMed PMID: 16722286.
- 521 28. Sessler DI. Complications and treatment of mild hypothermia. *Anesthesiology*.  
522 2001;95(2):531-43. doi: 10.1097/0000542-200108000-00040. PubMed PMID:  
523 WOS:000170237800036.
- 524 29. Marschner JA, Schäfer H, Holderied A, Anders H-J. Optimizing Mouse Surgery with  
525 Online Rectal Temperature Monitoring and Preoperative Heat Supply. Effects on Post-Ischemic  
526 Acute Kidney Injury. *PLOS ONE*. 2016;11(2):e0149489. doi: 10.1371/journal.pone.0149489.
- 527 30. Kehlet H. Multimodal approach to control postoperative pathophysiology and  
528 rehabilitation. *British Journal of Anaesthesia*. 1997;78(5):606-17. PubMed PMID:  
529 WOS:A1997WZ84800025.
- 530 31. Kehlet H, Wilmore DW. Evidence-based surgical care and the evolution of fast-track  
531 surgery. *Annals of Surgery*. 2008;248(2):189-98. doi: 10.1097/SLA.0b013e31817f2c1a. PubMed  
532 PMID: WOS:000258054000007.
- 533 32. Armstrong T, Wagner MC, Cheema J, Pang DSJ. Assessing analgesia equivalence and  
534 appetite following alfaxalone- or ketamine-based injectable anesthesia for feline castration as

- 535 an example of enhanced recovery after surgery. *Journal of Feline Medicine and Surgery*.  
536 2018;20(2):73-82. doi: 10.1177/1098612x17693517. PubMed PMID: WOS:000423328800002.
- 537 33. Buisman M, Hasiuk MMM, Gunn M, Pang DSJ. The influence of demeanor on scores  
538 from two validated feline pain assessment scales during the perioperative period. *Veterinary*  
539 *Anaesthesia and Analgesia*. 2017;44(3):646-55. doi: 10.1016/j.vaa.2016.09.001. PubMed PMID:  
540 WOS:000423289500027.
- 541 34. Hasiuk MMM, Brown D, Cooney C, Gunn M, Pang DSJ. Application of fast-track surgery  
542 principles to evaluate effects of atipamezole on recovery and analgesia following  
543 ovariohysterectomy in cats anesthetized with dexmedetomidine-ketamine-hydromorphone.  
544 *Javma-Journal of the American Veterinary Medical Association*. 2015;246(6):645-53. doi:  
545 10.2460/javma.246.6.645. PubMed PMID: WOS:000352967900022.
- 546 35. Satinoff E. NEURAL ORGANIZATION AND EVOLUTION OF THERMAL REGULATION IN  
547 MAMMALS. *Science*. 1978;201(4350):16-22. doi: 10.1126/science.351802. PubMed PMID:  
548 WOS:A1978FE04300007.
- 549 36. Kurz A. Physiology of Thermoregulation. *Best Practice & Research Clinical*  
550 *Anesthesiology*. 2008;22(4):627-44. doi: 10.1016/j.bpa.2008.06.004.
- 551 37. Taylor DK. Study of two devices used to maintain normothermia in rats and mice during  
552 general anesthesia. *J Amer Assoc Lab Anim Sci*. 2007;46(5):37-41. PubMed PMID:  
553 WOS:000252862500006.
- 554 38. Andrzejowski J, Hoyle J, Eapen G, Turnbull D. Effect of prewarming on post-induction  
555 core temperature and the incidence of inadvertent perioperative hypothermia in patients  
556 undergoing general anaesthesia. *Br J Anaesth*. 2008;101(5):627-31. Epub 2008/09/30. doi:  
557 10.1093/bja/aen272. PubMed PMID: 18820248.
- 558 39. Horn EP, Bein B, Bohm R, Steinfath M, Sahili N, Hocker J. The effect of short time periods  
559 of pre-operative warming in the prevention of peri-operative hypothermia. *Anaesthesia*.  
560 2012;67(6):612-7. Epub 2012/03/02. doi: 10.1111/j.1365-2044.2012.07073.x. PubMed PMID:  
561 22376088.
- 562 40. Just B, Trevien V, Delva E, Lienhart A. PREVENTION OF INTRAOPERATIVE HYPOTHERMIA  
563 BY PREOPERATIVE SKIN-SURFACE WARMING. *Anesthesiology*. 1993;79(2):214-8. doi:  
564 10.1097/00000542-199308000-00004. PubMed PMID: WOS:A1993LP76100003.
- 565 41. Albrecht M, Henke J, Tacke S, Markert M, Guth B. Effects of isoflurane, ketamine-  
566 xylazine and a combination of medetomidine, midazolam and fentanyl on physiological variables  
567 continuously measured by telemetry in Wistar rats. *BMC Vet Res*. 2014;10. doi: 10.1186/s12917-  
568 014-0198-3. PubMed PMID: WOS:000341201600001.
- 569 42. Roehl AB, Teubner A, Funcke S, Goetzenich A, Rossaint R, Tolba R, et al. Accidental renal  
570 injury by an external heating device during surgery in rats. *Lab Anim*. 2011;45(1):45-9. Epub  
571 2010/12/25. doi: 10.1258/la.2010.010076. PubMed PMID: 21183530.
- 572 43. Sakaguchi Y, Stephens LC, Makino M, Kaneko T, Strebel FR, Danhauser LL, et al.  
573 APOPTOSIS IN TUMORS AND NORMAL-TISSUES INDUCED BY WHOLE-BODY HYPERTHERMIA IN  
574 RATS. *Cancer Res*. 1995;55(22):5459-64. PubMed PMID: WOS:A1995TD88700058.
- 575 44. Zhang EQ, Knight CG, Pang DS. Heating Pad Performance and Efficacy of 2 Durations of  
576 Warming after Isoflurane Anesthesia of Sprague-Dawley Rats (*Rattus norvegicus*). *J Am Assoc*  
577 *Lab Anim Sci*. 2017;56(6):786-91. Epub 2017/12/20. PubMed PMID: 29256374; PubMed Central  
578 PMCID: PMC5710158.
- 579 45. Glostien B, Hynson J, Sessler DI, McGuire J. PREANESTHETIC SKIN-SURFACE WARMING  
580 REDUCES REDISTRIBUTION HYPOTHERMIA CAUSED BY EPIDURAL BLOCK. *Anesthesia and*  
581 *Analgesia*. 1993;77(3):488-93. PubMed PMID: WOS:A1993LW21600012.

- 582 46. Dilsaver SC, Overstreet DH, Peck JA. Measurement of temperature in the rat by rectal  
583 probe and telemetry yields compatible results. *Pharmacology, biochemistry, and behavior*.  
584 1992;42(3):549-52. Epub 1992/07/01. PubMed PMID: 1409790.
- 585 47. Lomax P. Measurement of 'Core' Temperature in the Rat. *Nature*. 1966;210(5038):854-  
586 5. doi: 10.1038/210854a0.
- 587 48. Clark-Price S. Inadvertent Perianesthetic Hypothermia in Small Animal Patients. *Vet Clin*  
588 *North Am Small Anim Pract*. 2015;45(5):983-94. Epub 2015/05/28. doi:  
589 10.1016/j.cvsm.2015.04.005. PubMed PMID: 26014270.
- 590



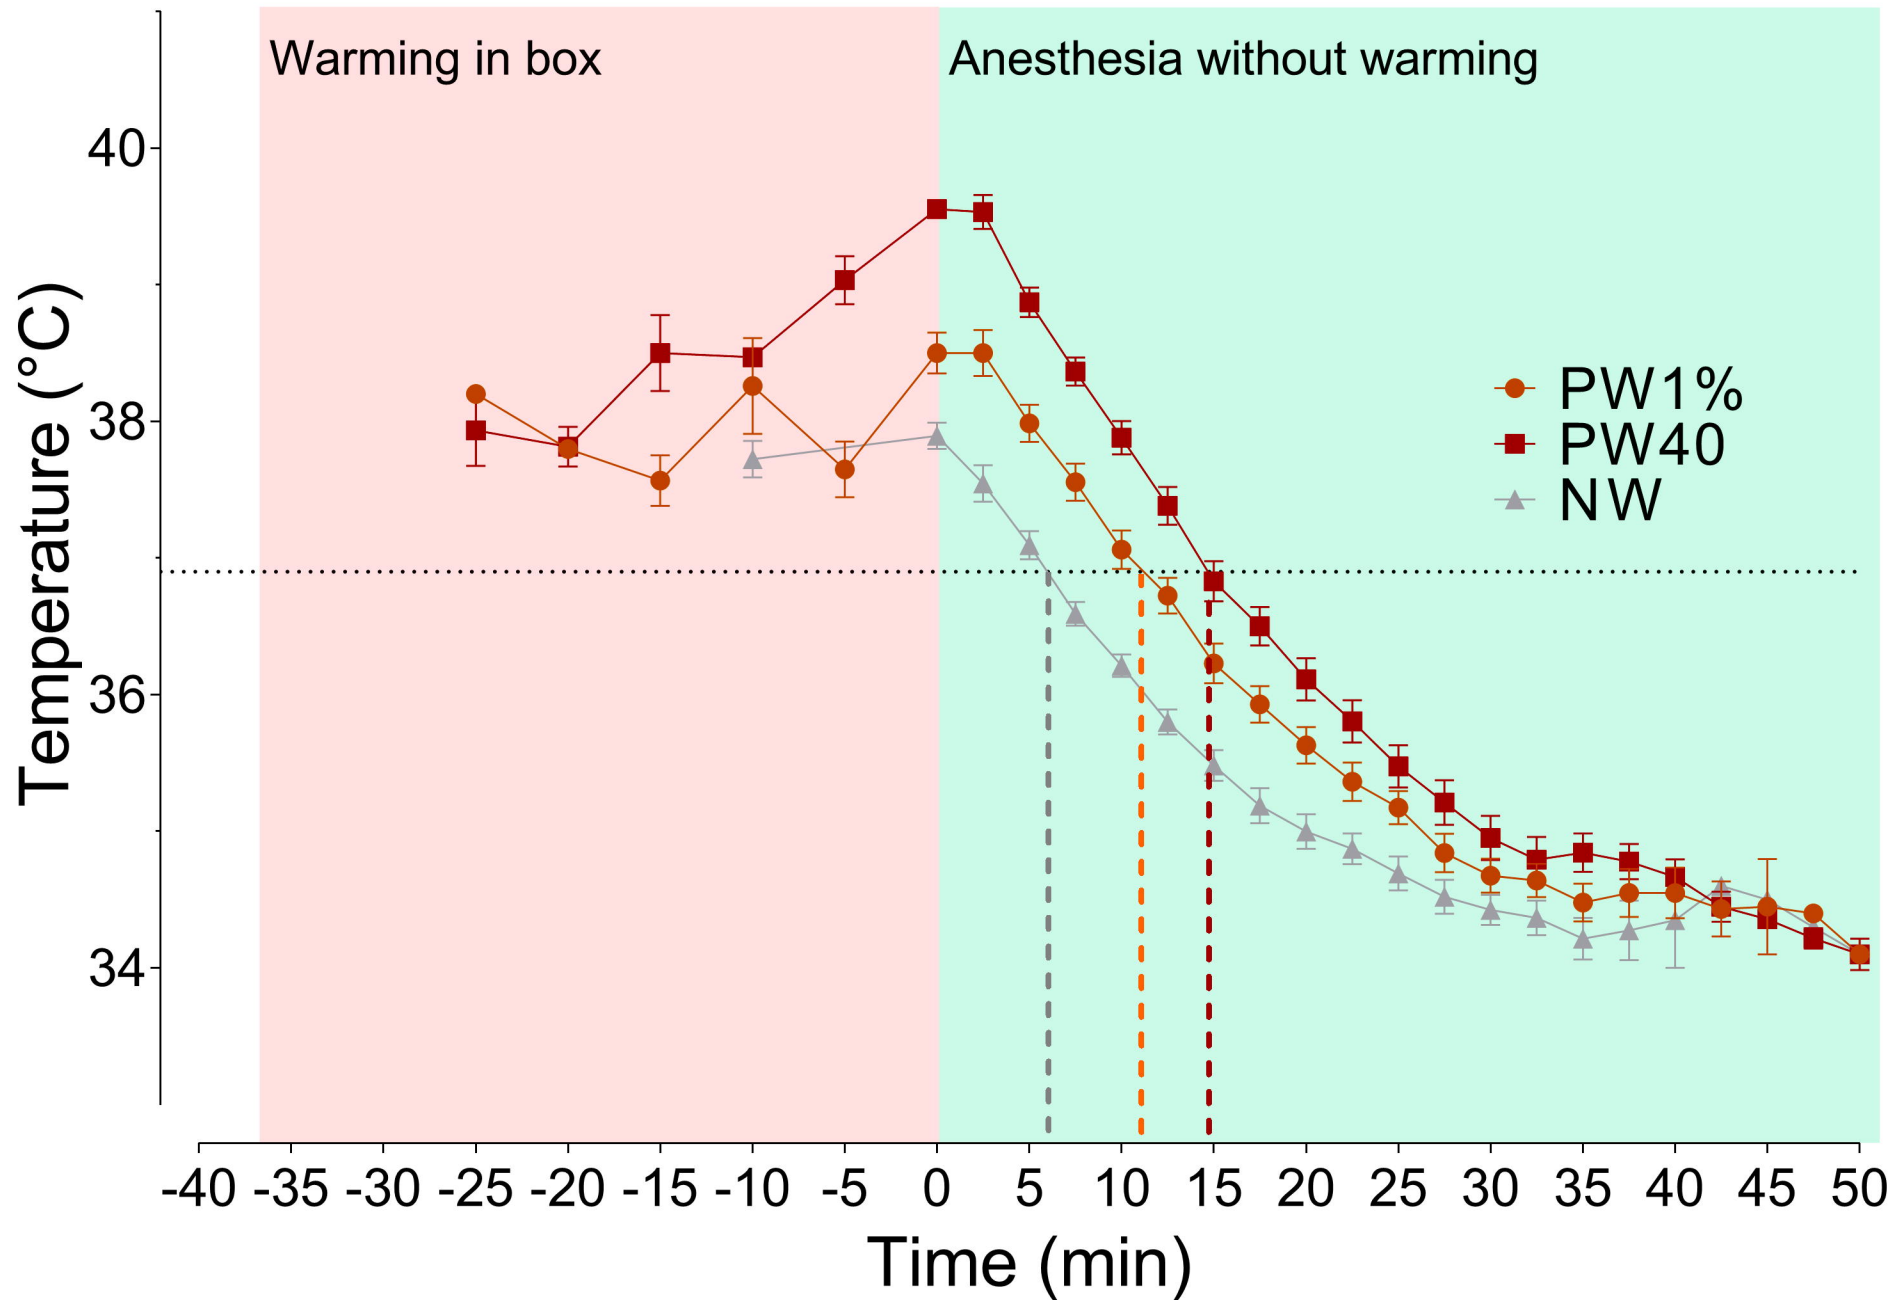

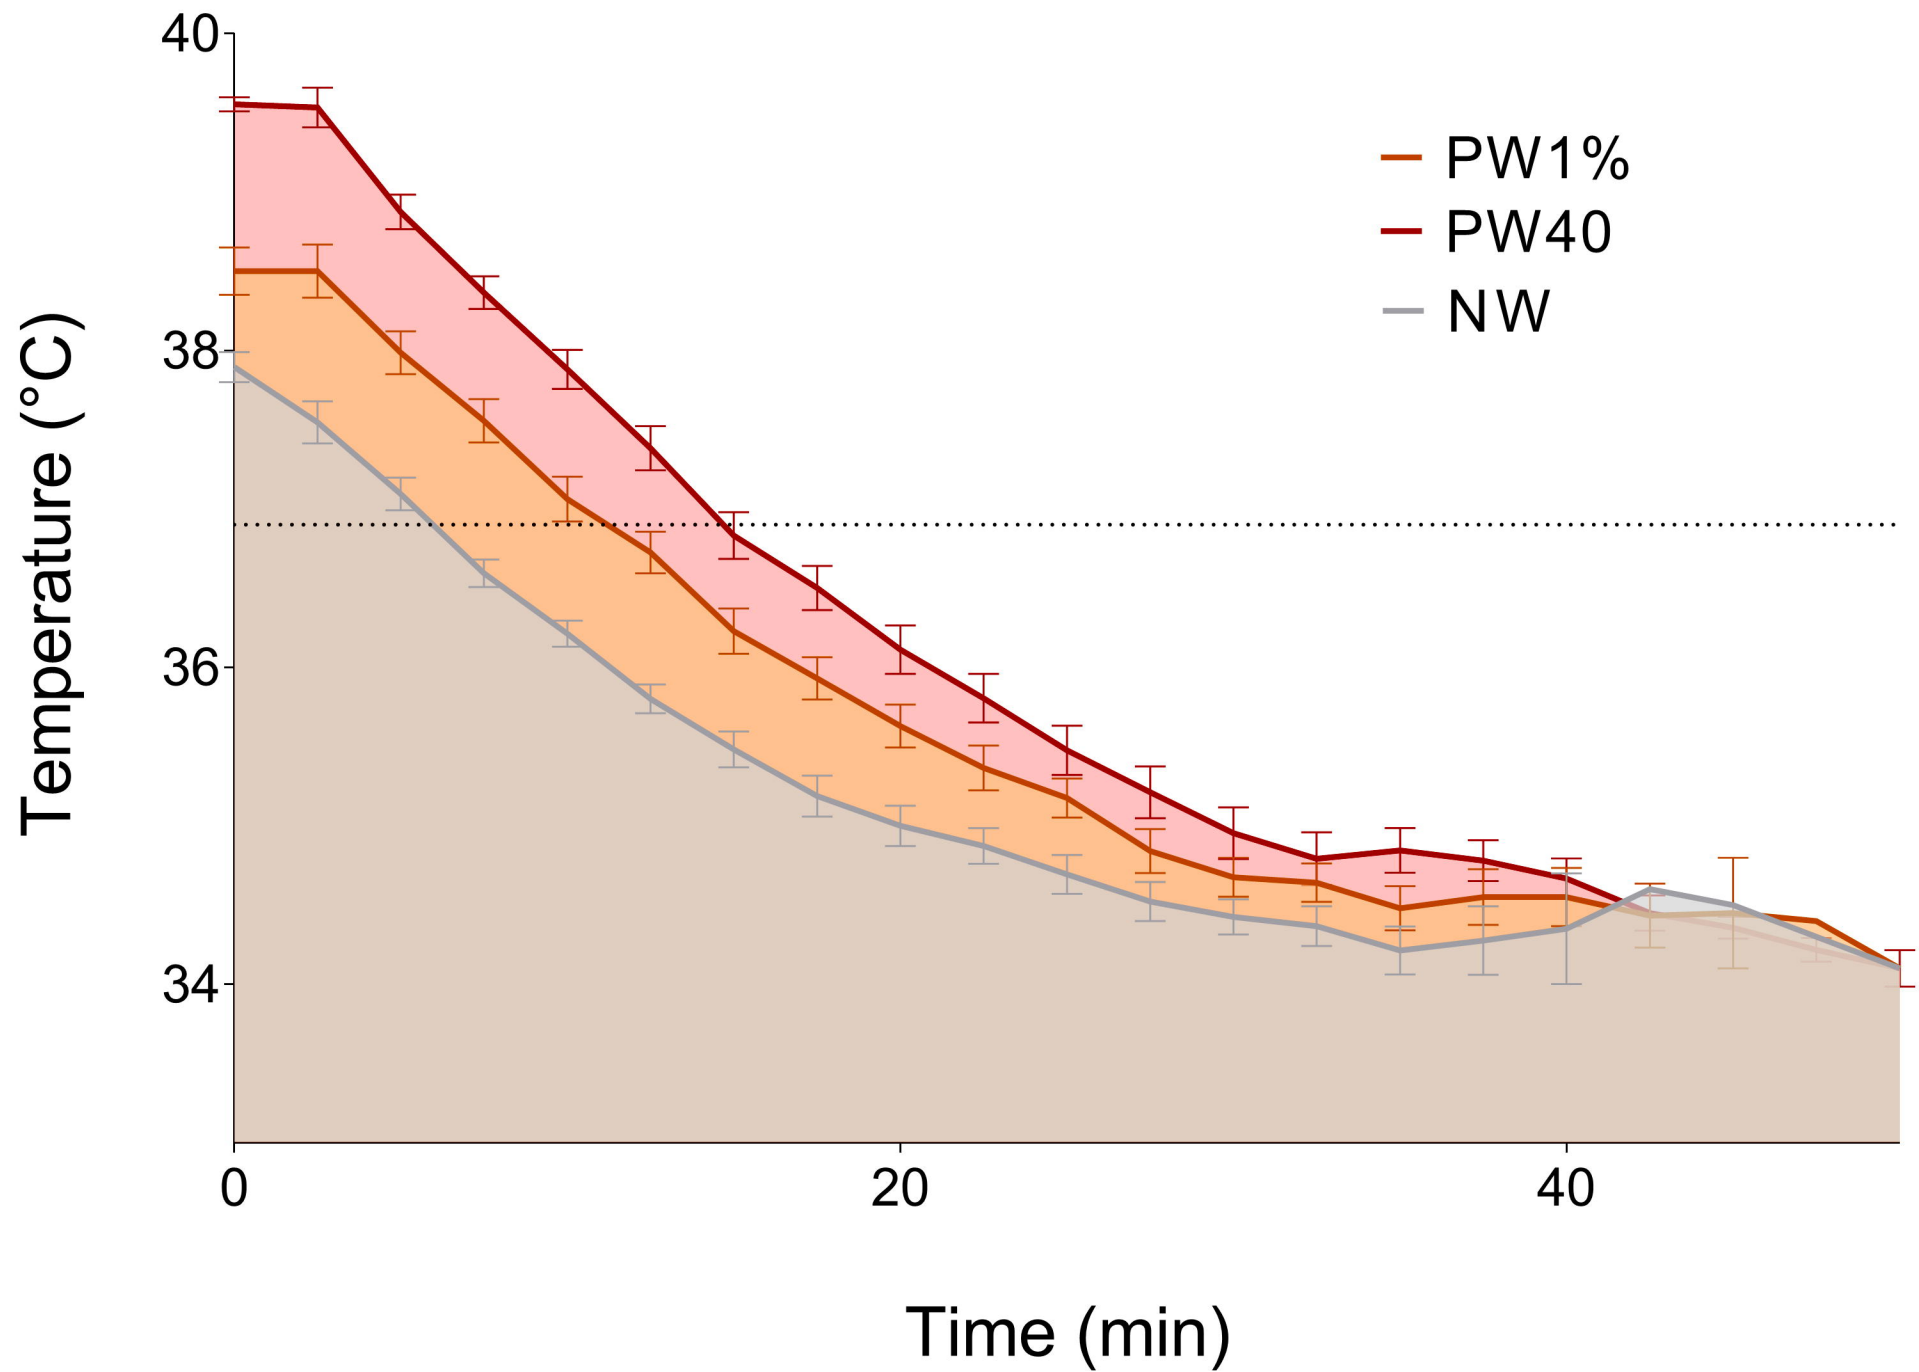

Time to hypothermia (min)

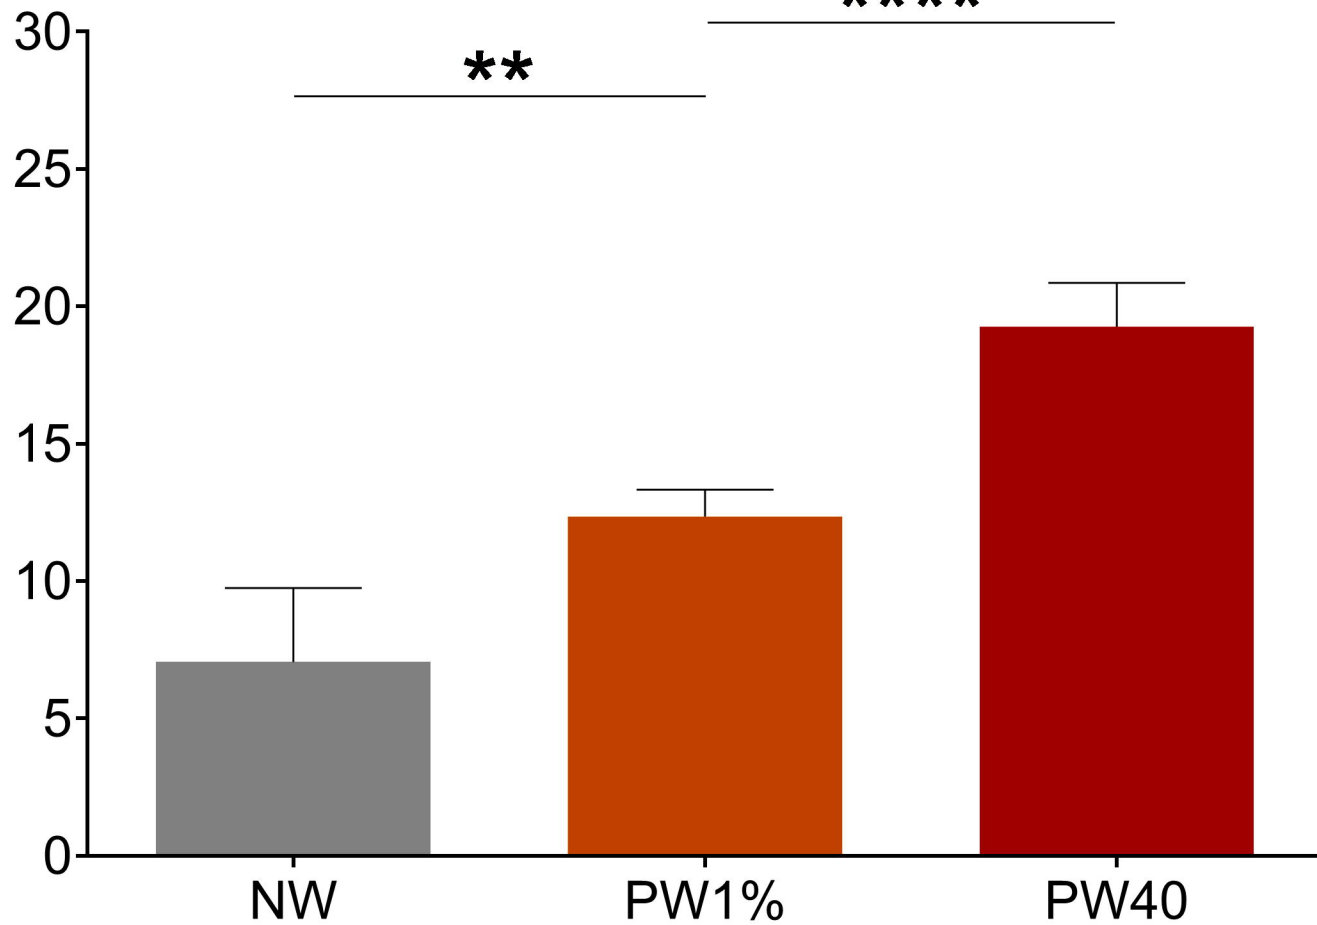

Treatment Group

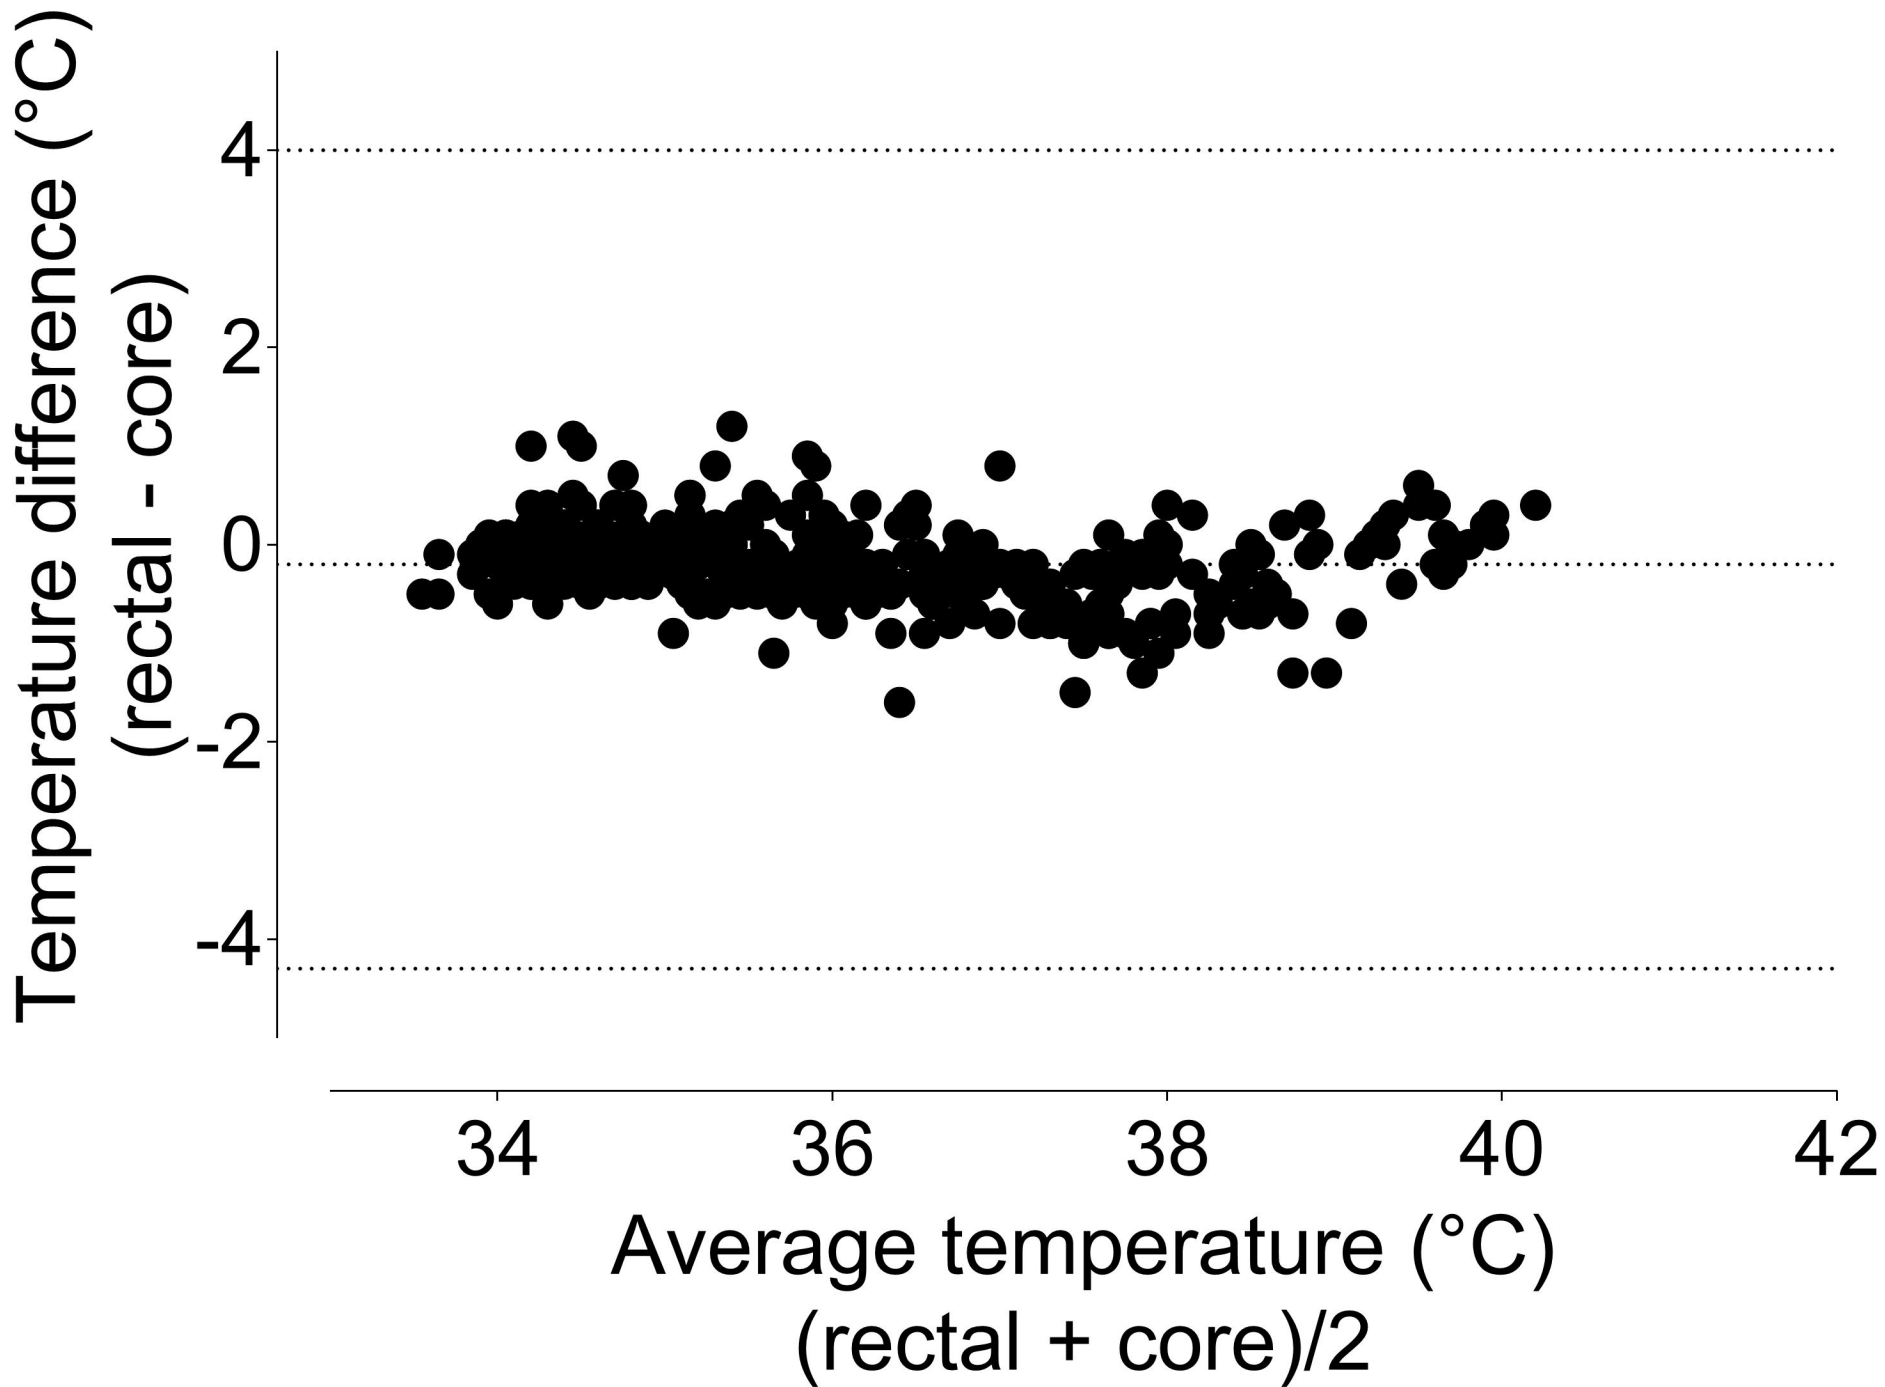

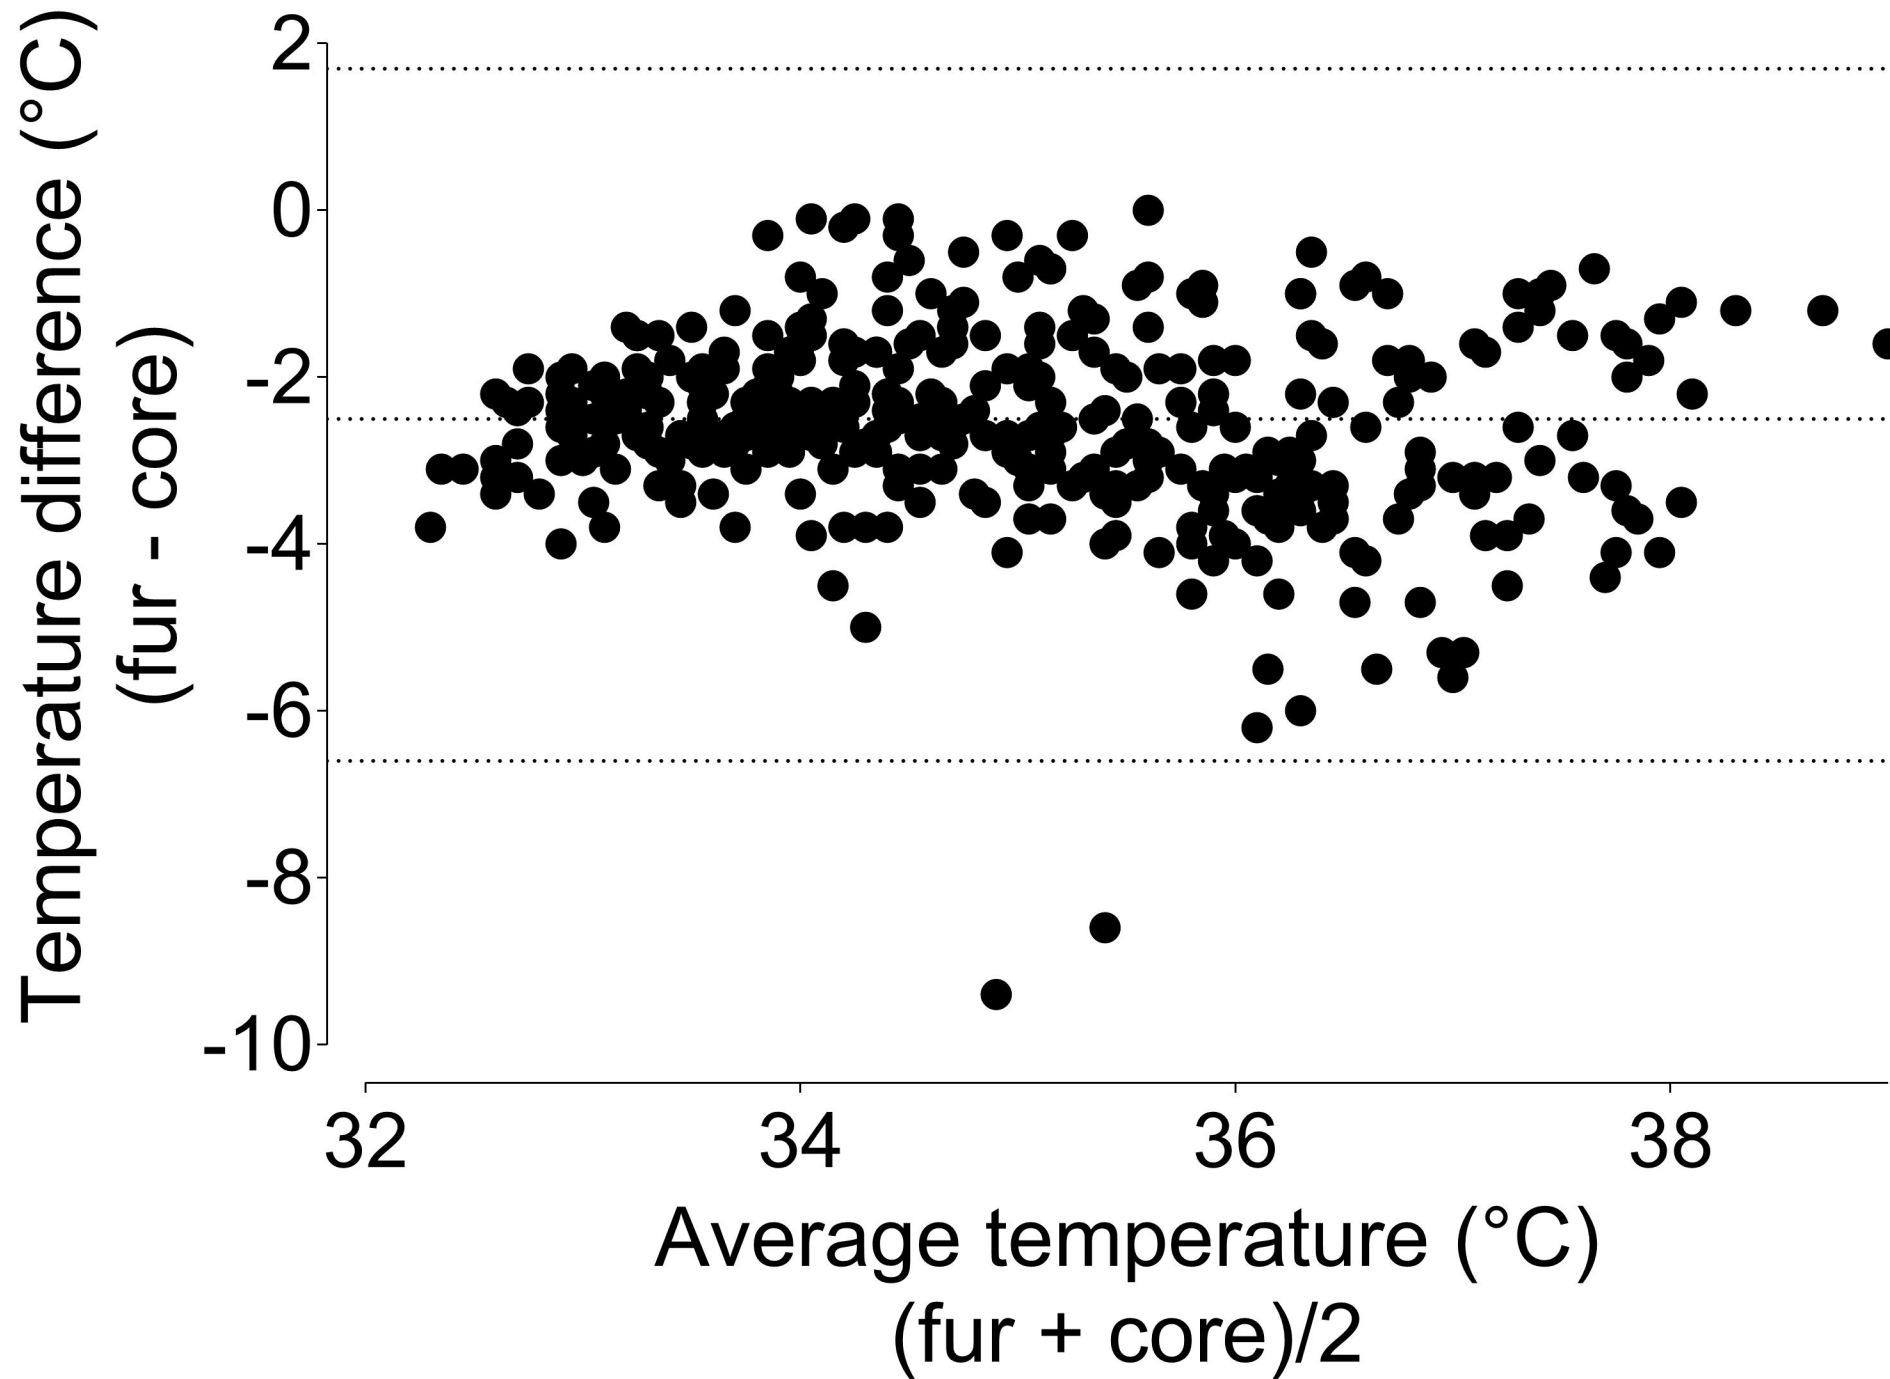

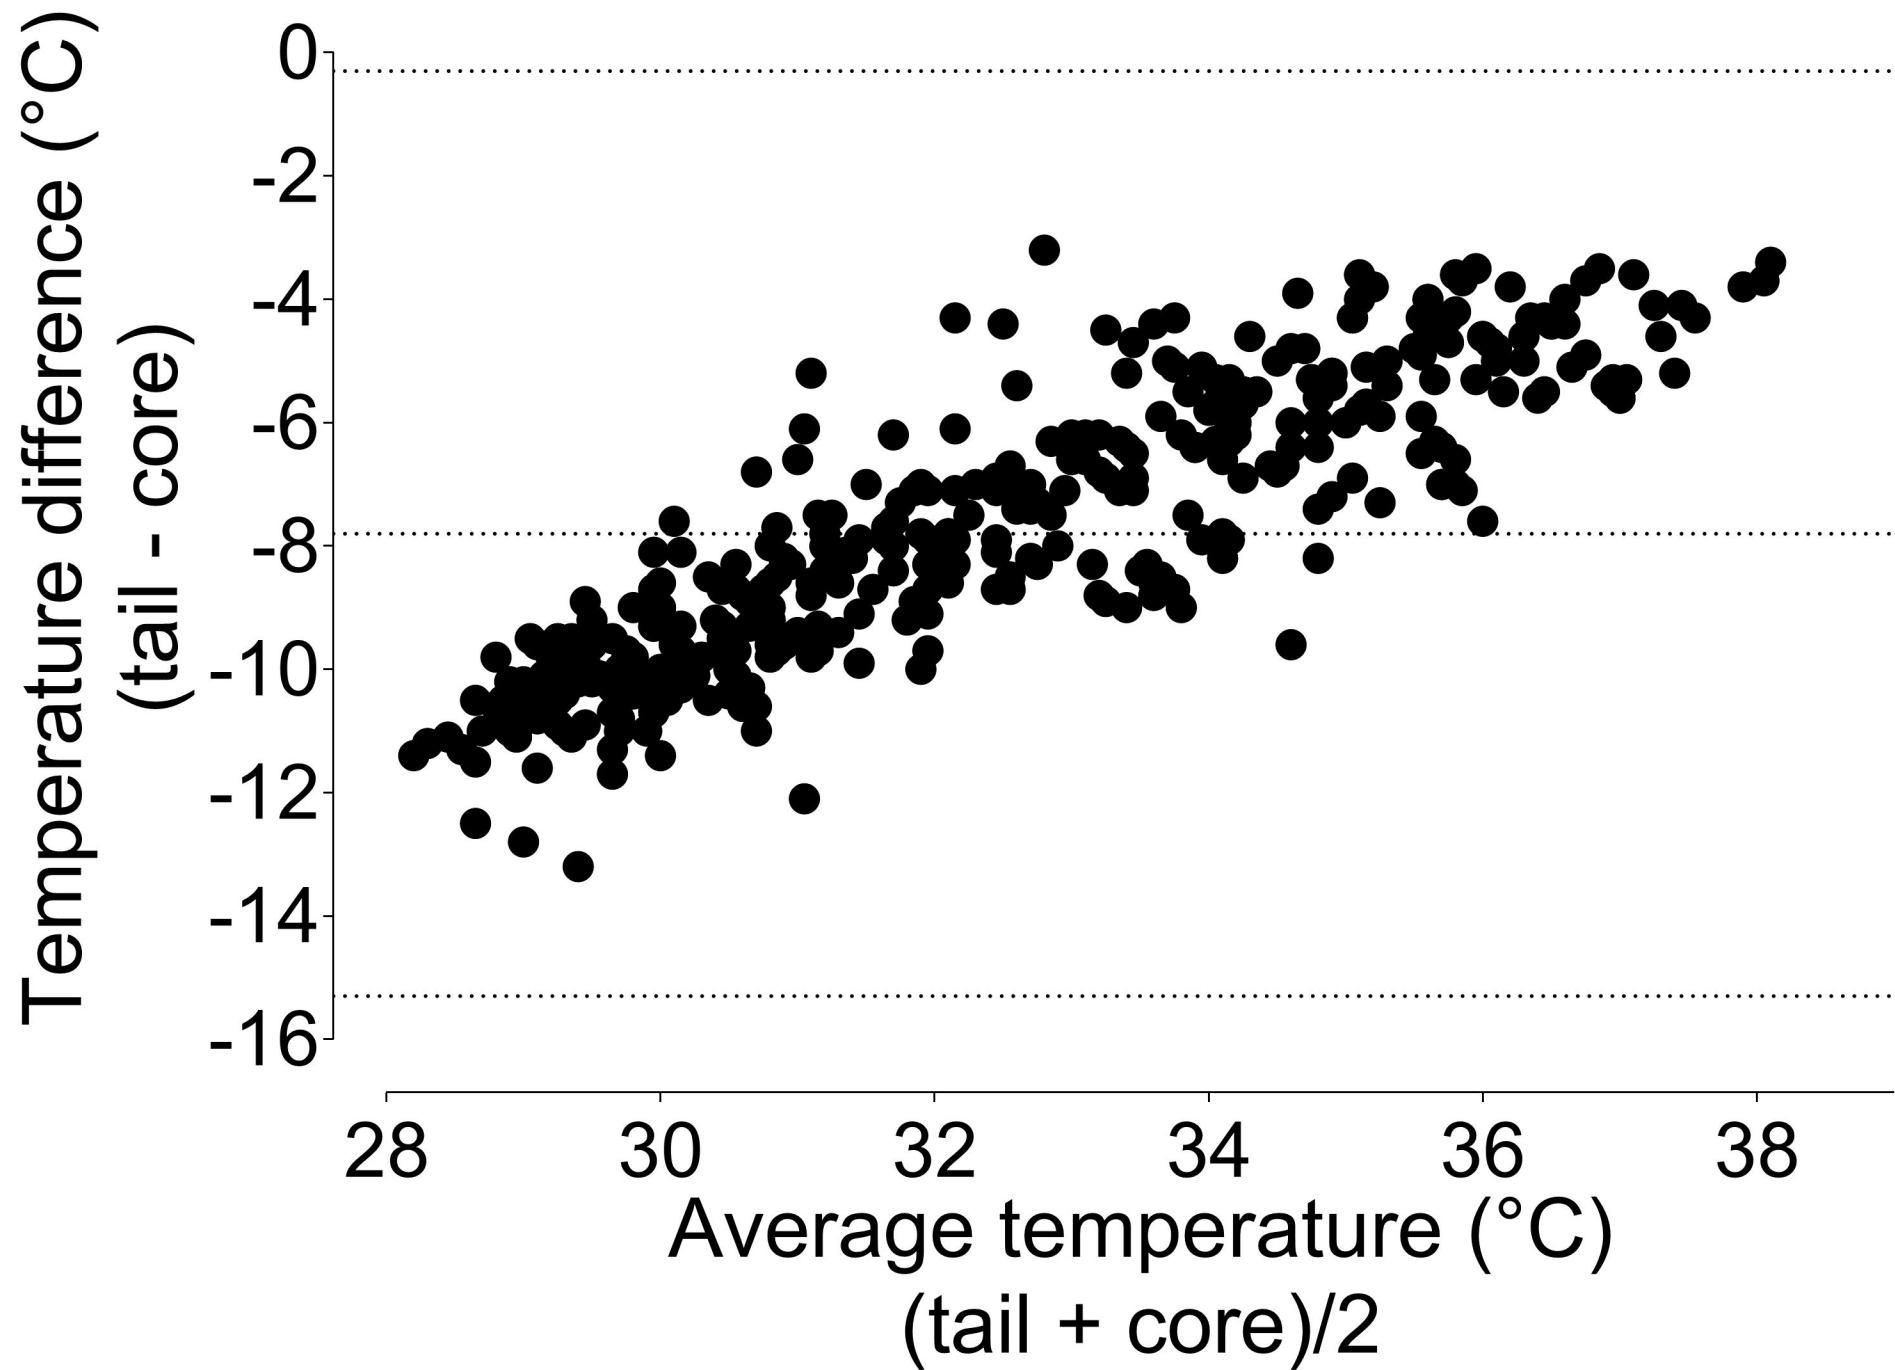

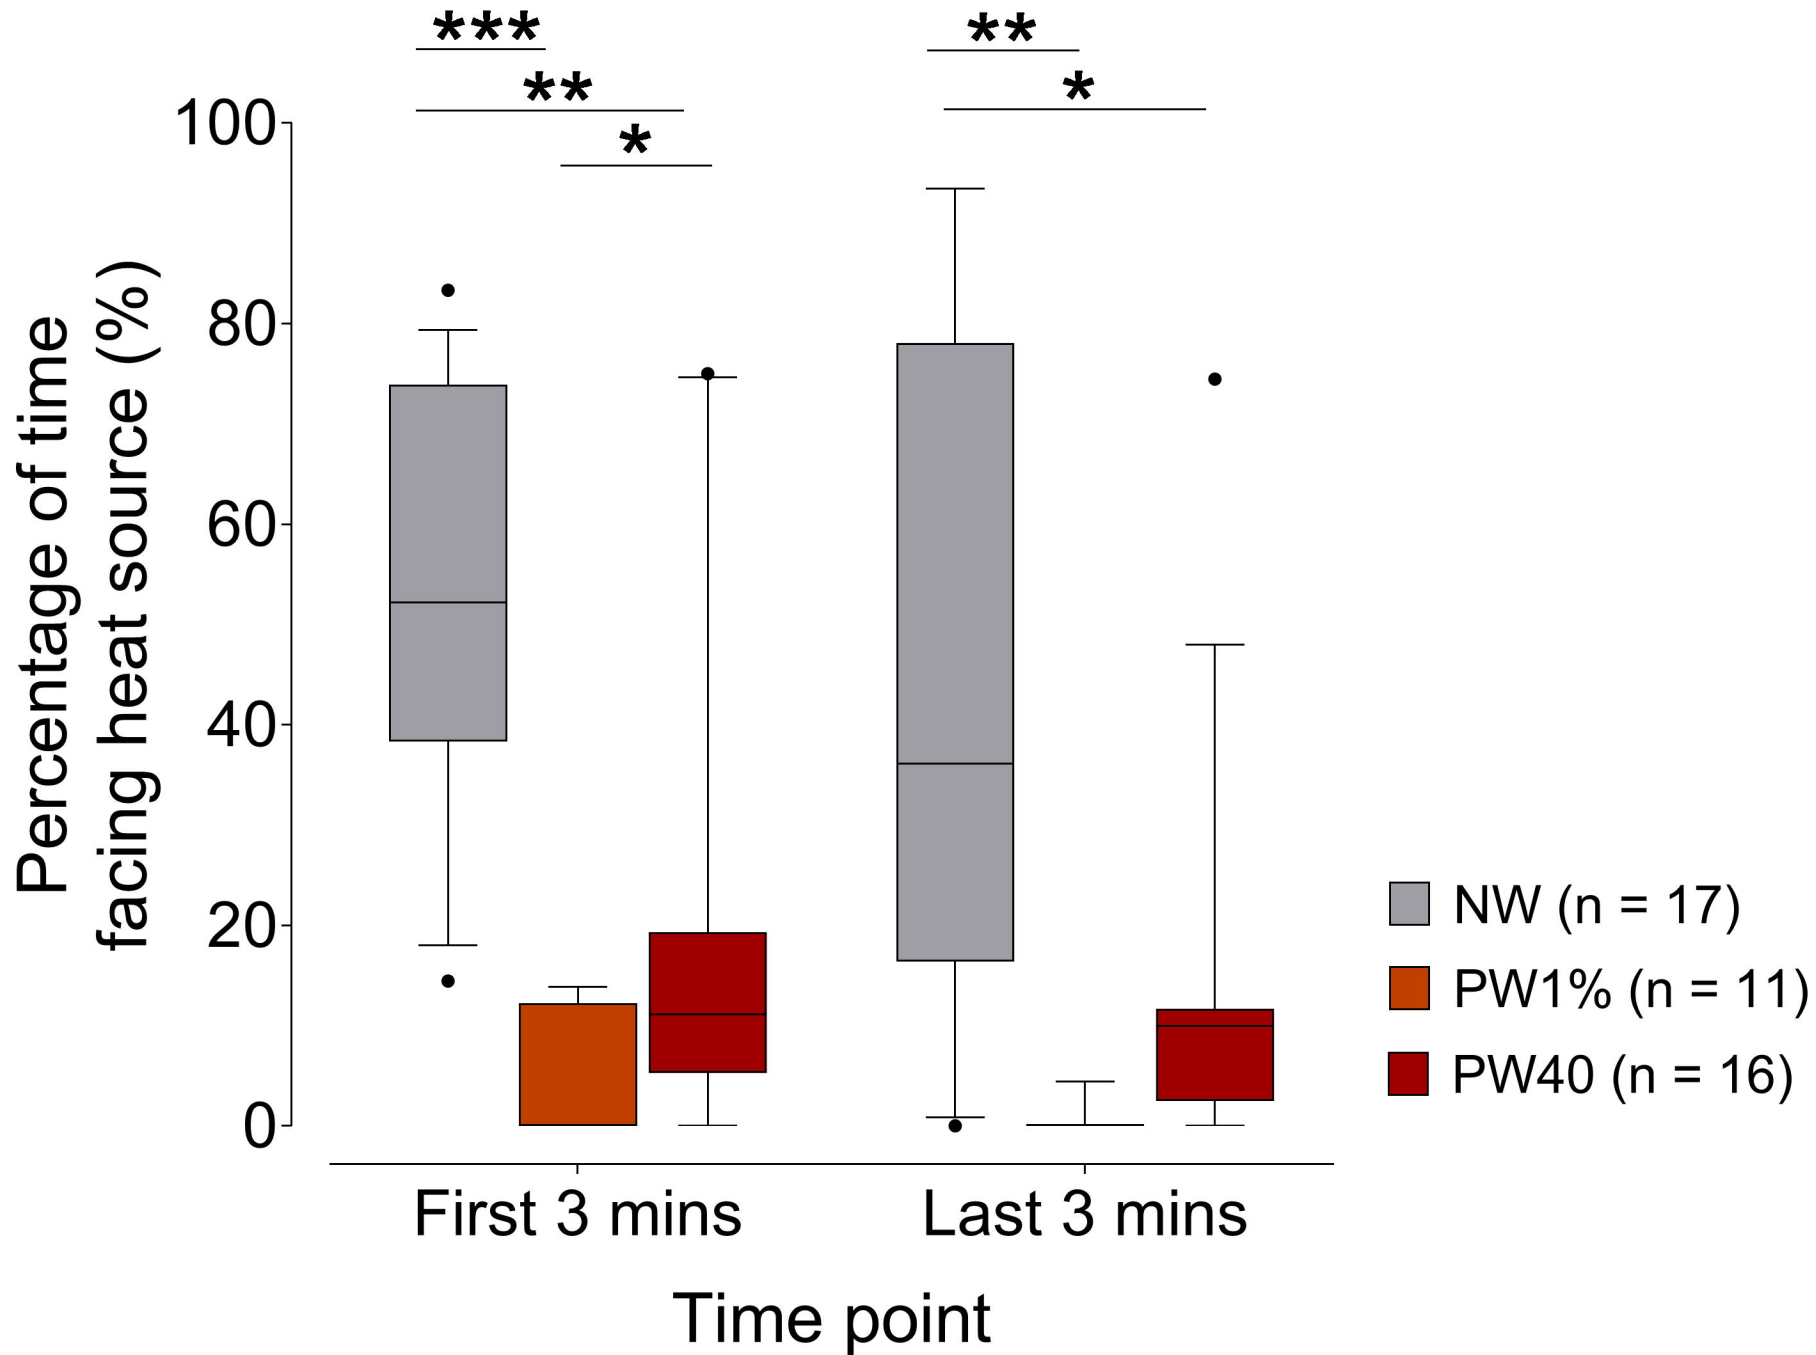

Source: https://www.biorxiv.org/content/10.1101/714899v1.full.pdf
